# Supplementary material for: A crystal-processing machine using a deep-ultraviolet laser: application to long-wavelength native SAD experiments
Source: PubMed Central journal article supplement (PMC8805218; doi:10.1107/s2053230x2101339x), 2022-01-27
Supplement: f-78-00088-sup1.pdf [file f-78-00088-sup1.pdf]

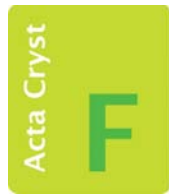

STRUCTURAL BIOLOGY  
COMMUNICATIONS

**Volume 78 (2022)**

**Supporting information for article:**

**A crystal-processing machine using a deep-ultraviolet laser:  
application to long-wavelength native SAD experiments**

**Yoshiaki Kawano, Masahide Hikita, Naohiro Matsugaki, Masaki Yamamoto and  
Toshiya Senda**

**Movie S1** Demonstration of the processing of a BphA4 crystal into a sphere using a crystal processing machine. The crystal size was  $400 \times 250 \times 100 \mu\text{m}^3$  and the crystal was shaped into a sphere with a diameter of  $90 \mu\text{m}$ . The deep-UV laser irradiation conditions were  $1.0 \mu\text{J/pls}$  at  $5.0 \text{ kHz}$ , with an average laser power at the sample position of about  $3.3 \text{ mW}$ .

**Movie S2** Demonstration of the solvent removal processing of a BphA4 crystal using a crystal processing machine. The crystal size was  $350 \times 200 \times 100 \mu\text{m}^3$ . The deep-UV laser irradiation conditions were  $1.0 \mu\text{J/pls}$  at  $5.0 \text{ kHz}$ , with an average laser power at the sample position of about  $3.3 \text{ mW}$ .

**Movie S3** Demonstration of the processing of a BphA4 crystal into a cylinder using a crystal processing machine. The crystal size was  $300 \times 150 \times 80 \mu\text{m}^3$  and the crystal was shaped into a cylinder with a diameter of  $70 \mu\text{m}$ . The deep-UV laser irradiation conditions were  $1.0 \mu\text{J/pls}$  at  $5.0 \text{ kHz}$ , with an average laser power at the sample position of about  $3.3 \text{ mW}$ .
